# Supplementary material for: Promoting desulfurization capacity and separation efficiency simultaneously by the novel magnetic Fe3O4@PAA@MOF-199
Source: Royal Society of Chemistry journal article supplement (doi:10.1039/c4ra06515h), 2014-01-01
Supplement: c4ra06515h1.pdf [file c4ra06515h1.pdf]

Electronic Supplementary Information (ESI) for

**Promoting desulfurization capacity and separation efficiency simultaneously by the  
novel magnetic Fe<sub>3</sub>O<sub>4</sub>@PAA@MOF-199**

Tian Jin,<sup>a</sup> Qiang Yang,<sup>a</sup> Chun Meng,<sup>a</sup> Jian Xu,<sup>b</sup> Honglai Liu,<sup>a</sup> Jun Hu<sup>\*,a</sup>, and Hao Ling<sup>\*,a</sup>

<sup>a</sup>State Key Laboratory of Chemical Engineering and Department of Chemistry, East China

University of Science and Technology, Shanghai, 200237, China

<sup>b</sup>Shanghai Institute of Measurement and Testing Technology, 1500 Zhangheng Road, Shanghai

201203, China

AUTHOR INFORMATION

**Corresponding Author**

\*Tel & Fax: +86-21-64252195. Email: junhu@ecust.edu.cn.

\*Tel & Fax: +86-21-64252328. Email: linghao@ecust.edu.cn.

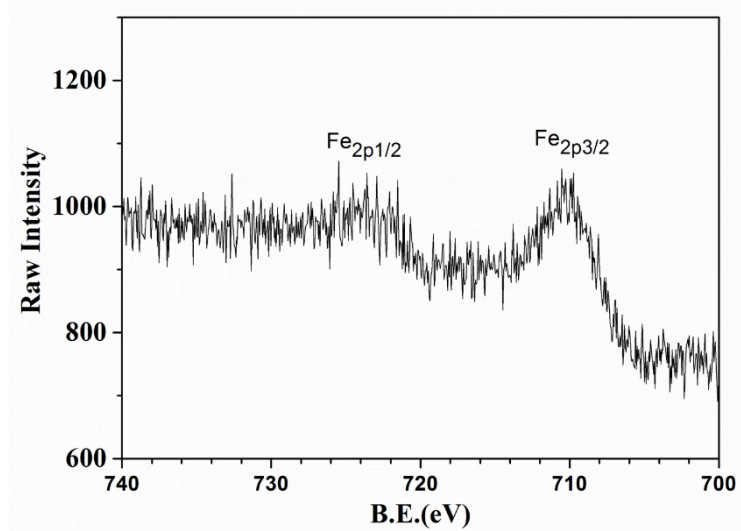

**Figure S1.** XPS spectrum of Fe<sub>3</sub>O<sub>4</sub>@PAA

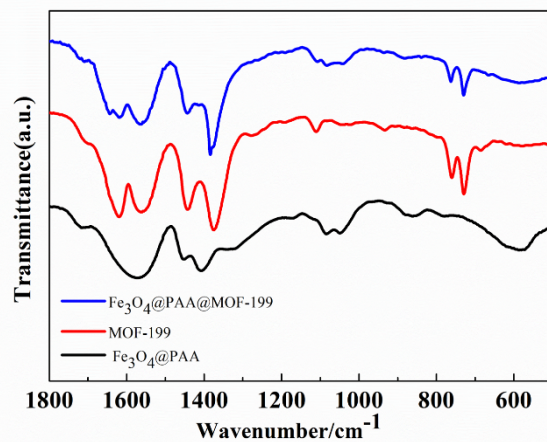

**Figure S2.** The FTIR spectrum of Fe<sub>3</sub>O<sub>4</sub>@PAA (black), MOF-199 (red) and Fe<sub>3</sub>O<sub>4</sub>@PAA@MOF-199 (blue)

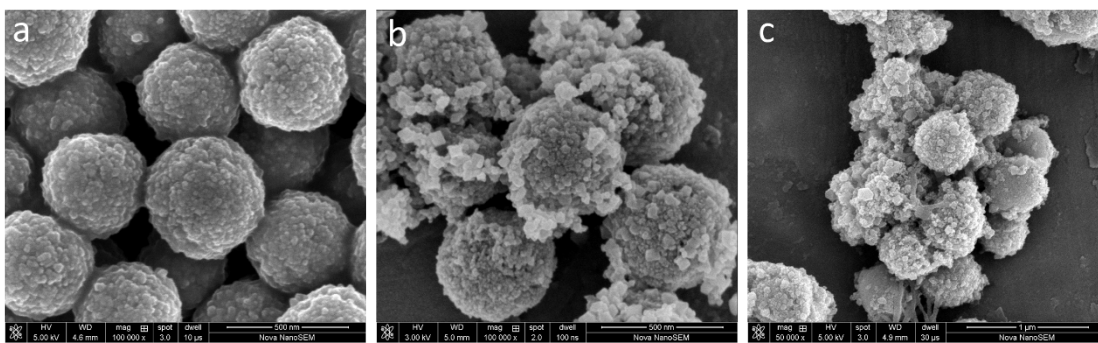

**Figure S3.** SEM images of Fe<sub>3</sub>O<sub>4</sub>@PAA@MOF-199 through ‘Layer by Layer’ (LBL) method (alternately stirring in the solutions of copper acetate and 1,3,5-benzenetricarboxylic acid, respectively, and rising with ethanol in the interval). (a) pristine Fe<sub>3</sub>O<sub>4</sub>@PAA, (b) 5 cycles through LBL method and (c) 10 cycles through LBL method

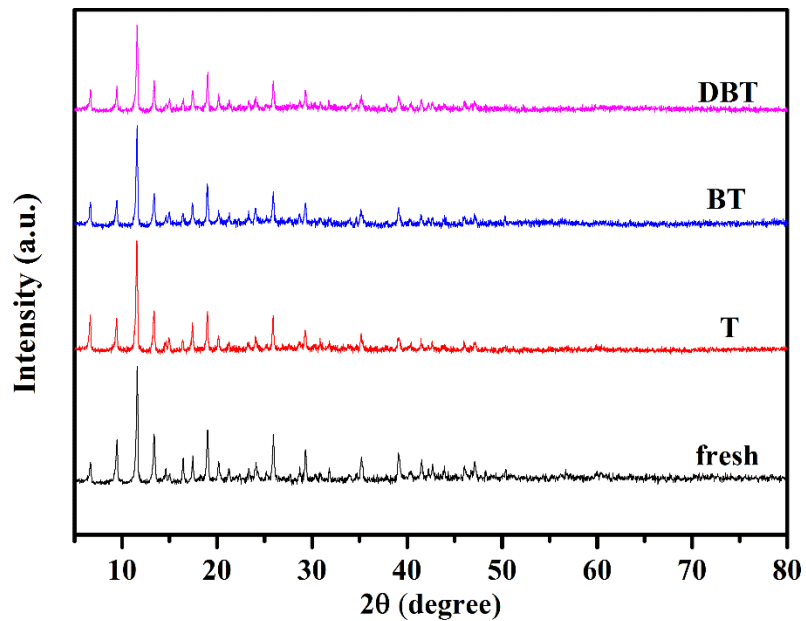

**Figure S4.** X-ray diffraction pattern of fresh  $\text{Fe}_3\text{O}_4@\text{PAA}@\text{MOF-199}$  (H) before desulfurization (fresh) and regenerated  $\text{Fe}_3\text{O}_4@\text{PAA}@\text{MOF-199}$  (H) after adsorption for 6 h in model oil containing 500 mg/L thiophene, BT and DBT, respectively

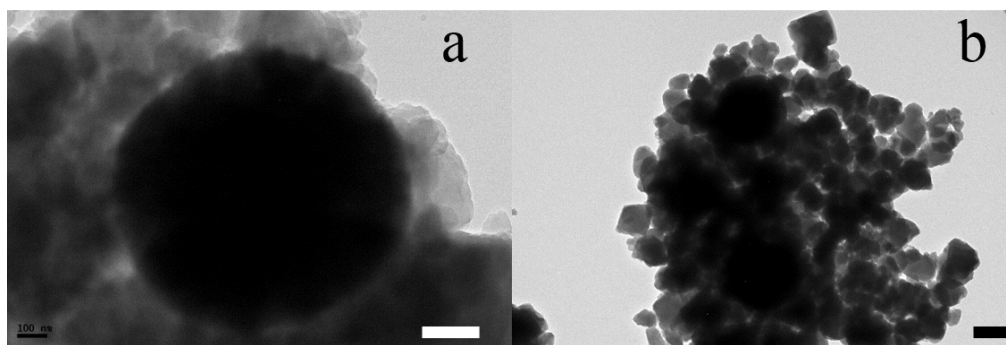

**Figure S5.** TEM images of  $\text{Fe}_3\text{O}_4@PAA@MOF-199$  after the desulfurization of DBT, scale bar: 200 nm

---

**Table S1.** Copper (II) content in Fe<sub>3</sub>O<sub>4</sub> and Fe<sub>3</sub>O<sub>4</sub>@PAA (the samples were stirred in 30 g/L ethanol solution of copper nitrate overnight and then washed with ethanol for 3 times before drying and digestion with HCl and HNO<sub>3</sub>)

| Samples                             | Mass (g) | Total volume of HCl and HNO <sub>3</sub> (mL) | ICP-AES (mg/L) | Copper (II) content (mg/g) |
|-------------------------------------|----------|-----------------------------------------------|----------------|----------------------------|
| Fe <sub>3</sub> O <sub>4</sub>      | 0.04     | 20                                            | 0.43           | 0.22                       |
| Fe <sub>3</sub> O <sub>4</sub> @PAA | 0.03     | 20                                            | 120            | 80                         |

---

**Table S2.** Textural parameters of Fe<sub>3</sub>O<sub>4</sub>@PAA@MOF-199 before and after the desulfurization of DBT

| Sample                                                       | S <sub>BET</sub><br>(m <sup>2</sup> g <sup>-1</sup> ) | S <sub>micro</sub><br>(m <sup>2</sup> g <sup>-1</sup> ) | V <sub>total</sub><br>(cm <sup>3</sup> g <sup>-1</sup> ) | V <sub>micro</sub><br>(cm <sup>3</sup> g <sup>-1</sup> ) |
|--------------------------------------------------------------|-------------------------------------------------------|---------------------------------------------------------|----------------------------------------------------------|----------------------------------------------------------|
| Fe <sub>3</sub> O <sub>4</sub> @PAA@MOF-199 (L)              | 863                                                   | 764                                                     | 0.47                                                     | 0.37                                                     |
| DBT adsorbed Fe <sub>3</sub> O <sub>4</sub> @PAA@MOF-199 (L) | 792                                                   | 715                                                     | 0.41                                                     | 0.35                                                     |
| Regenerated Fe <sub>3</sub> O <sub>4</sub> @PAA@MOF-199 (L)  | 844                                                   | 743                                                     | 0.45                                                     | 0.36                                                     |
| Fe <sub>3</sub> O <sub>4</sub> @PAA@MOF-199 (H)              | 824                                                   | 702                                                     | 0.50                                                     | 0.34                                                     |
| MOF-199                                                      | 1286                                                  | 1081                                                    | 0.53                                                     | 0.70                                                     |
